1 Diversity Predicts Ability of Bacterial Consortia to Mitigate a Lethal Wildlife Pathogen

2 Rachael E. Antwis<sup>1,2</sup>, Xavier A. Harrison<sup>3</sup>

3

4 1. School of Environment and Life Sciences, University of Salford, Salford, UK

5 2. Unit for Environmental Sciences and Management, North-West University, Potchefstroom,

6 South Africa

7 3. Institute of Zoology, Zoological Society of London, Regent's Park, London NW1 4RY

8

9 **Address for Correspondence:**

10 Dr. Rachael Antwis, University of Salford, Room 336, Peel Building, The Crescent, Salford,

11 M5 4WT, UK

12 01612954641

13 [r.e.antwis@salford.ac.uk](mailto:r.e.antwis@salford.ac.uk)

14

15 **Running Title:**

16 Diversity predicts bacterial anti-fungal activity

17

18 **Conflict of Interest:**

19 The authors declare no conflict of interest.

20

21

22

23

24 **ABSTRACT**

25 Symbiotic bacterial communities can protect their hosts from infection by pathogens.  
26 Treatment of wild individuals with protective bacteria can combat the spread of emerging  
27 infectious diseases (EIDs), but it is unclear whether the degree of bacterially-mediated host  
28 protection is uniform across multiple isolates of globally-distributed pathogens. Here we use  
29 the lethal fungal pathogen *Batrachochytrium dendrobatidis* (*Bd*) as a model to investigate the  
30 traits predicting broad-scale *in vitro* inhibitory capabilities of both individual bacteria and  
31 multiple-bacterial consortia. We show that inhibition of multiple pathogen isolates is rare, with  
32 no clear phylogenetic signal at the genus level. Bacterial consortia offer stronger protection  
33 against *B. dendrobatidis* compared to single isolates, but critically this was only true for  
34 consortia containing multiple genera, and this pattern was not uniform across all *B.*  
35 *dendrobatidis* isolates. These novel insights have important implications for the effective  
36 design of bacterial probiotics to mitigate EIDs.

37

## 38 INTRODUCTION

39 The last 50 years have seen the emergence of several hypervirulent wildlife pathogens with  
40 broad host ranges (Tompkins et al 2015). These emerging infectious disease (EIDs) have  
41 decimated wildlife populations globally, and are a major contributor to the so-called current  
42 “biodiversity crisis” (e.g. Skerratt et al 2007; McCallum 2012). Both climate change (Cohen et  
43 al 2017) and the global trade in animals (Tompkins et al 2015) are contributing to the  
44 increased spread of EIDs, and broad-scale, effective treatments and/or prophylaxis for these  
45 pathogens in the wild are often lacking (Sleeman 2013; Garner et al 2016). Developing such  
46 treatments is often complicated by broad variation in genetic and phenotypic traits such as  
47 virulence exhibited by these pathogens (e.g. de Jong & Hien 2006; Schock et al 2010; Farrer  
48 et al 2011). Successful mitigation of EIDs in the wild demands that preventative or curative  
49 therapies demonstrate broad activity over as many genetic variants of the pathogen as  
50 possible, and developing mitigation strategies that satisfy this criterion remains a major  
51 outstanding research goal.

52 Most EIDs are attributed to fungal pathogens, including *Pseudogymnoascus destructans* that  
53 causes white nose syndrome in bats, and *Batrachochytrium spp.*, which causes  
54 chytridiomycosis in amphibians (Fisher et al 2012). *Batrachochytrium dendrobatidis*  
55 comprises multiple, deeply diverged lineages, and is capable of rapid evolution (Farrer et al  
56 2011; 2013). Endemic lineages of *B. dendrobatidis* have been identified, including *BdCAPE*  
57 (South Africa), *BdCH* (Switzerland), *BdBrazil* (Brazil) and a lineage from Japan (Goka et al  
58 2009; Farrer et al 2011; Schloegel et al 2012; Rosenblum et al 2013; Rodriguez et al 2014),  
59 although there are cases where these have spread to other regions and are implicated in  
60 population declines in those regions (e.g. *BdCAPE* in Mallorcan midwife toads, *Alytes*  
61 *muletensis*; Doddington et al 2013). The globally distributed and hypervirulent global  
62 panzootic lineage (*BdGPL*) is the genetic lineage of *B. dendrobatidis* associated with  
63 phenomenal mass mortalities and rapid population declines of amphibians around the world,  
64 and is a major driver of the current “amphibian extinction crisis” (Fisher et al 2009; Farrer et

65 al 2011; Olson et al 2012). Isolates within this lineage exhibit enormous and unpredictable  
66 variation in virulence, even within a single host species exposed under laboratory conditions  
67 (Farrer et al 2011; Farrer et al 2013). There is currently no cure for this disease in the wild  
68 (reviewed in Garner et al 2016), and given that amphibian communities may be host to  
69 multiple *BdGPL* genotypes (Morgan et al 2007; Rodriguez et al 2014), and the continuous  
70 global movement of humans and wildlife that can transport the fungus, any prophylactic or  
71 curative treatment needs to be effective against multiple *B. dendrobatidis* genotypes and  
72 isolates.

73 Bacterial probiotics represent a promising tool to combat major emerging fungal pathogens in  
74 the wild, including *Pseudogymnoascus destructans* (Hoyt et al 2015), *B. dendrobatidis*, and  
75 the closely related *B. salamandrivorans* (Martel et al 2013; 2014). Of these, probiotic  
76 research is currently most advanced for *B. dendrobatidis* (reviewed in Bletz et al 2013 and  
77 Rebollar et al 2016). Laboratory and field studies have shown host-associated bacterial  
78 communities (hereafter referred to as the 'microbiome') protect amphibians from *B.*  
79 *dendrobatidis* infection, and that it is possible to artificially augment the microbiome with  
80 'probiotic' bacteria to improve survivorship in response to the pathogen (Bletz et al 2013; Jani  
81 & Briggs 2014; Becker et al 2015; Walke et al 2015).

82 To date, most *in vitro* *BdGPL* challenge experiments have tested the ability of candidate  
83 probiotics to limit the growth of just a single isolate of *BdGPL*. This is problematic, because the  
84 inhibitory capabilities of individual bacteria are not uniform across the variation presented by  
85 *BdGPL* (Antwis et al 2015). Previous work has found no evidence of a phylogenetic signal in  
86 the ability of bacterial genera to inhibit a singular *BdGPL* isolate (Becker et al 2015), but a  
87 major gap in our understanding concerns whether some bacterial genera are more likely to  
88 show broad-spectrum inhibition across a range of *BdGPL*s, allowing a more focussed search  
89 for effective amphibian probiotics. Furthermore, both *in vivo* amphibian probiotic trials and *in*  
90 *vitro* challenges focus on the application of a singular bacterial isolate to arrest the growth of  
91 *B. dendrobatidis*, yet the importance of a complex and diverse microbiome for resilience to

92 infection has been repeatedly demonstrated across a range of host taxa (e.g. Dillon et al  
93 2005; Matos et al 2005; Van Elsas et al 2012; Eisenhauer et al 2013). A novel alternative  
94 strategy involves a 'bacterial consortium' approach to probiotics, whereby multiple inhibitory  
95 bacterial isolates are applied simultaneously. Multi-species consortia can increase the  
96 inhibition of *BdGPL* (Piova-Scott et al 2017), and so may offer greater inhibitory capabilities  
97 across a wider range of *B. dendrobatidis* isolates, but the generality of this pattern across  
98 multiple pathogen variants remains untested. Addressing the shortfall in our understanding is  
99 critical for developing effective tools for the mitigation of EIDs in the wild.

100 Here we extend previous work to quantify the ability of metabolites from both individual  
101 bacteria and co-cultured bacterial consortia to demonstrate broad-scale inhibition across a  
102 panel of *B. dendrobatidis* isolates. First, we test 58 bacterial isolates from 10 genera for  
103 inhibition against a suite of 10 different *BdGPL* isolates to quantify i) variation among  
104 bacterial genera in ability to demonstrate broad-spectrum *BdGPL* inhibition and ii) variation  
105 among *BdGPL* isolates in susceptibility to inhibition. Second, we quantify the relative efficacy  
106 of using single bacterial isolates or bacterial consortia to modify *B. dendrobatidis* growth  
107 rates *in vitro*. Specifically, we investigate iii) whether consortia yield stronger inhibition than  
108 single bacteria across three *B. dendrobatidis* isolates from two lineages (*BdGPL* and  
109 *BdCAPE*); and iv) whether the diversity of a bacterial consortium (number of member  
110 genera) affects inhibitory capabilities.

111

112

113

114

## 115 METHODS

### 116 *Phylogeny screening*

117 *In vitro* challenges were conducted for 58 bacteria isolated from wild *Agalychnis spp.* frogs in  
118 Belize (Antwis et al 2015) to screen for inhibitory capabilities against 10 *Bd*GPL isolates  
119 (Table 1, Figure 1) using an *in vitro* spectrophotometer assay method adapted from Bell et al.  
120 (2013), Woodhams et al (2014) and Becker et al (2015). Bacteria belonged to 10 genera,  
121 with 3-11 bacterial isolates per genus (Table S1). Bacteria were grown by adding 50ul of  
122 frozen stock bacteria (stored in 30% glycerol, 70% tryptone solution at -80°C) to 15ml of 1%  
123 tryptone, and incubating at 18°C for 36 hours until visibly turbid (three cultures per bacterial  
124 isolate). Bacterial densities were counted using a haemocytometer and adjusted to ~500,000  
125 cells/ml. Bacteria were then filtered through a 0.22um sterile filter (Millipore, Ireland) to  
126 remove live cells, leaving only bacterial metabolites in solution, which were combined across  
127 cultures for a given bacterial isolate, and then kept on ice until *B. dendrobatidis* challenges  
128 were conducted. *Bd*GPL (Table 1) isolates were grown in 1% tryptone broth until maximum  
129 zoospore production was observed (~3-4 days;  $\sim 1 \times 10^6$  zoospores ml<sup>-1</sup>). As with bacteria,  
130 three flasks per *B. dendrobatidis* isolate were grown and then combined prior to challenges  
131 to limit flask-effect. Zoospores were separated from sporangia by filtering through 20um  
132 sterile filters (Millipore, Ireland). To conduct the spectrophotometer assays, 50ul of bacterial  
133 metabolites and 50ul of *B. dendrobatidis* suspension were pipetted into 96-well plates. Each  
134 *B. dendrobatidis*-bacteria combination was run with three repeats. Positive controls were  
135 included using 50ul 1% tryptone instead of bacterial metabolites. Negative controls were  
136 included using 50ul sterile water and 50ul of heat-treated *B. dendrobatidis* for each isolate.  
137 Plate readings were taken every 24 hours for four days using a 492nm filter.

138

139 For each measurement, data were transformed using the equation  $\ln(\text{OD}/(1-\text{OD}))$ , and a  
140 regression analysis was used to gain the slope values for each sample over time. Slopes of  
141 triplicate replicates for each *Bd*/Bacteria combination were averaged, and total *B.*

142 *dendrobatidis* inhibition was calculated using the formula: Inhibition (%) = [1-(slope of  
143 sample/slope of control)] x 100. A positive value represents inhibition of *B. dendrobatidis*  
144 growth, and a negative value indicates enhanced growth of *B. dendrobatidis*.

145

#### 146 *Bacterial consortium challenges*

147 Three bacteria were then selected from each of four genera (*Acinetobacteria*,  
148 *Chryseobacterium*, *Serratia*, *Stenotrophomonas*) based on their inhibition profiles; poor to  
149 medium inhibitors were selected to determine whether combining these bacteria would  
150 improve their inhibitory capabilities. Bacteria were grown individually until turbid, adjusted to  
151 ~500,000 cells/ml, and added to fresh tryptone either individually (strains A, B and C of each  
152 genus separately), or as a triple (strains A, B and C of each genus together to form single-  
153 genus mixes, or a random combination of strains across genera to form multi-genus (Table  
154 2)). To combine bacteria, a total of 3ml of bacteria were added to 12ml of fresh 1% tryptone  
155 broth and left to grow together for 18 hours. The volume of each bacterium added depended  
156 on whether the consortium contained one or three bacteria, and the volume was split evenly  
157 between the number of bacteria added to each group. Following this, bacteria-*B.*  
158 *dendrobatidis* challenges were conducted using the same methods as described above  
159 against three *B. dendrobatidis* isolates (Table 1). Average inhibition percentages for each  
160 consortium-*B. dendrobatidis* combination were calculated as previously described.

161

#### 162 *Statistical Analysis*

163 All statistical analyses were conducted in the software R v.3.3.2 (R Core Team 2016). R  
164 scripts for all analyses presented in this manuscript are provided as a R Markdown document  
165 in supplementary information.

166

167 *Phylogeny Data*: To quantify differences among genera in proportion of *BdGPL* isolates  
168 inhibited (inhibition score >0), we fitted a Binomial GLM with the proportion of the 10 *BdGPL*  
169 isolates each bacterial isolate inhibited as the response, and genus as a fixed effect. We  
170 used the quasibinomial error structure as the model was overdispersed (dispersion 6.4), and  
171 tested the model containing a genus term with the reduced intercept-only model using a  
172 likelihood ratio test.

173 To quantify differences among genera in the *degree* of inhibition (size of inhibition score), we  
174 fitted a hierarchical model in the R package *MCMCglmm* (Hadfield 2010) with the individual  
175 inhibition scores of each bacterial isolate (n=58) for each *BdGPL* isolate (n=10; total n = 580)  
176 as a Gaussian response. We fitted both *BdGPL* isolate, and bacterial strain ID nested within  
177 bacterial genus as random effects. We use uninformative, parameter-expanded priors for the  
178 random effects as detailed in Hadfield (2010). We ran models for a total of 100,000 iterations  
179 following a burn-in of 10,000 iterations and using a thinning interval of 50. Posterior model  
180 checks indicated no significant autocorrelation within chains (all values < 0.05) and adequate  
181 convergence using the Geweke diagnostic (Geweke 1992). Inspection of model residuals  
182 from the frequentist analogue of this model fitted in *lme4* (Bates et al 2015) revealed  
183 normally-distributed residuals and no evidence of heteroscedasticity. Rerunning models with  
184 stronger priors has no effect on model results.

185 To calculate % variance in inhibition explained by *BdGPL* isolate, bacterial genus, and  
186 bacterial strain respectively, we extracted the variance components from the variance-  
187 covariance matrix of the model above. We expressed the variance of a component *V* as a  
188 percentage of the total variance calculated as ( $V_{BdGPL} + V_{genus} + V_{strain} + V_{residual}$ ). We  
189 calculated both mean and 95% credible intervals using the posterior samples from the  
190 model. To construct Figs. 1 and 2, we extracted the marginal means and 95% credible  
191 intervals for each bacterial strain and *BdGPL* isolate, respectively. That is, the bacterial strain  
192 modes are marginalised with respect to *BdGPL* and vice versa, to quantify whether the  
193 *average* scores for each *BdGPL* or bacterial isolate are significantly different from zero.



194 *Consortium Data*: To calculate the relative mean inhibition of single-genus (SG) vs multi-  
195 genus (MG) consortia, we fitted a mixed model in *MCMCglmm* with inhibition as a Gaussian  
196 response, consortium type as a 2-level factor, and a random effect of *B. dendrobatidis* and  
197 using uninformative priors. To calculate whether consortia exhibited stronger inhibition than  
198 the mean of their individual isolates, we constructed a binary variable with outcome 1 if a  
199 consortium's inhibition was greater than the single isolate mean and 0 if lower. We fitted this  
200 as a response in a binary GLMM with consortium type as a fixed effect, *B. dendrobatidis* as a  
201 random effect and using uninformative priors. Neither model exhibited signs of  
202 autocorrelation and Geweke statistics for both models indicated convergence.

203

204 *Simulated Consortium Trials*: To probe the relative effectiveness of single bacteria, SG  
205 consortia and MG consortia (hereafter 'probiotic types') for modifying the growth rates of *B.*  
206 *dendrobatidis*, we ran three sets of simulations, each comprising 1000 iterations. For each  
207 set of simulations, we calculated i) the proportion of times a MG consortium yielded higher  
208 inhibition than a SG consortium; ii) the proportion of times a MG consortium yielded higher  
209 inhibition than a single bacterial isolate; iii) the probability that a MG, SG or single bacterial  
210 isolate would yield at least 50% inhibition, which we class as strong inhibition. We derived  
211 95% confidence intervals for each test statistic by performing 10,000 bootstrap samples with  
212 replacement from the test distributions. The three simulations were as follows:

213 (1) Averaged Over All *B. dendrobatidis* isolates: For each iteration, we randomly selected a  
214 *B. dendrobatidis* isolate, and then randomly selected both a SG and a MG consortium. A  
215 Single bacterial isolate score was then selected randomly from one of the members of the  
216 MG consortium.

217 (2) *B. dendrobatidis* specific scores: To investigate the potential for the effectiveness of  
218 consortia to differ depending on *B. dendrobatidis* isolate, we repeated the simulations as in  
219 (1) but performed 1000 simulations for *each* *B. dendrobatidis* isolate. (3) Sequential *B.*  
220 *dendrobatidis* exposure: Finally, we examined the ability of the three probiotic types to inhibit

221 two *B. dendrobatidis* isolates in series by randomly selecting two of the three *B.*  
222 *dendrobatidis* isolates. For each iteration, we selected a random MG and SG consortium,  
223 followed by a randomly-selected single isolate member from the MG consortium. Individual  
224 inhibition scores for these three groups were then extracted for both selected *B.*  
225 *dendrobatidis* isolates (i.e. probiotic ID was kept consistent over both pathogen isolates). We  
226 calculated the probability that the MG consortium would yield superior inhibition to the SG  
227 consortium and single bacterial isolate across both *B. dendrobatidis* isolates, and the  
228 probability that all three probiotic types would yield >50% inhibition.

229  
230

## 231 RESULTS

### 232 Phylogenetic Signals of *Bd*GPL Inhibition

233 We assayed the ability of 58 bacterial isolates from 10 genera to modify the growth rates of  
234 10 *Bd*GPL isolates. Mean inhibition scores ranged from 100% (complete inhibition of growth)  
235 to -225% (strong facilitation of growth). At the genus level, there was no significant variation  
236 among genera in mean proportion of *Bd*GPL isolates inhibited (Binomial GLM;  $\chi^2_9 = 6.2$ ,  
237  $p=0.72$ ; Table 3). Six isolates from five genera showed at least weak inhibition across all 10  
238 *Bd*GPLs, whilst seven isolates from five genera facilitated the growth of all 10 isolates  
239 (Supplementary Table S1).

240

241 Variance component analysis revealed considerably more variation in inhibition scores  
242 among bacterial strains *within* genera than among genera themselves (Fig. 1). Bacterial  
243 strain ID explained 51% [95% credible interval (CRI) 37-63%] of the variation in *Bd*GPL  
244 inhibition scores compared to just 1.3% [0.09-6%] for bacterial genus. *Bd*GPL isolate  
245 explained 15.6% [4.8-30%] of the variation in inhibition scores and highlighted two isolates  
246 whose marginal effect sizes were significantly negative (JEL423 and AUL2), and one isolate  
247 with a significantly positive marginalised inhibition score (08MG04; Fig. 2). JEL423 and AUL2  
248 therefore exhibit strongly enhanced growth in the presence of bacterial metabolites, whereas  
249 08MG04 is particularly susceptible to inhibition of growth. The remaining seven *Bd*GPL  
250 isolates demonstrated no evidence of systematic susceptibility to inhibition of their growth  
251 rates across the bacteria tested (Fig. 2).

252

### 253 Multi-Isolate Consortia as Tools for Pathogen Mitigation

254 Consortia containing isolates from Multi-Genus (MG) exhibited significantly higher mean  
255 inhibition scores compared to Single-Genus (SG) consortia when marginalising with respect  
256 to *B. dendrobatidis* isolate (MG consortia mean inhibition: 36.88%; SG consortia mean:

257 16.9%; 95% CRI of difference 4.12 – 36.52%,  $p_{\text{MCMC}} = 0.02$ ; Fig. 3). If the ability of a  
258 consortium to inhibit *B. dendrobatidis* was simply an additive function of the inhibitory  
259 capabilities of the individual bacteria it comprised, we would expect the consortium's  
260 inhibition score to be equal to the mean of the individual inhibition scores, weighted by  
261 relative abundance. Inhibition scores of consortia greater than the mean of individual isolate  
262 scores are indicative of synergistic effects, whereby the combined pool of metabolites from  
263 multiple bacteria inhibits *B. dendrobatidis* more strongly than the individual isolates. MG  
264 consortia had a 61% probability of demonstrating stronger inhibition than the mean of their  
265 single composite bacterial isolates, which was significantly higher than the corresponding  
266 probability for SG isolates (26.6%, Mean difference 39.4% [95% Credible Interval 11.2-  
267 65.1%],  $p_{\text{MCMC}} = 0.01$ ).

268

269 *in silico Probiotic Trials*: Of the 1000 simulated probiotic trials, naïve application of a MG  
270 consortium yielded higher *B. dendrobatidis* inhibition in 69.4% of cases [95% CI 66.5-72.3%]  
271 compared to SG consortia (null expectation 50%,  $p_{\text{RAND}} < 0.001$ ). Moreover, MG consortia had  
272 a 38.1% [35.1 – 41.1%] probability of yielding inhibition greater than 50% (strong inhibition),  
273 compared to only 13.9% [11.8 – 16.1%] probability for SG consortia. MG consortia  
274 outperformed the single isolate in 61% [58-64%] of cases (null expectation 50%,  
275  $p_{\text{RAND}} < 0.001$ ). However, by averaging over all *B. dendrobatidis* isolates, these results  
276 masked substantial variation among *B. dendrobatidis* isolates in the relative efficacy of MG  
277 versus SG consortia. We repeated the above simulations separately for each *B.*  
278 *dendrobatidis* isolate, and found that MG consortia were superior to SG consortia and single  
279 bacterial isolates for only two *B. dendrobatidis* isolates (*BdGPL MODS28* and *BdCAPE*  
280 *TF5a1*), and performed slightly worse than SG consortia for *BdGPL SFBC019* (Fig. 4A).  
281 Moreover, although MG consortia have the greatest probability of yielding >50% inhibition for  
282 *BdGPL MODS28* and *BdCAPE TF5a1*, this was not the case for *BdGPL SFBC019*, where  
283 SG consortia had a marginally higher probability of delivering strong inhibition (Fig. 4B).

284

285 Finally, we tested the ability of both MG and SG consortia to inhibit the growth of two  
286 different *B. dendrobatidis* isolates in series, as individuals in a single location may be  
287 exposed to multiple variants of a pathogen (Goka et al 2009; Schloegel et al 2012; Rodriguez  
288 et al 2014; Jenkinson et al 2016), or strong spatial structure of the pathogen and high host  
289 dispersal may expose individuals to multiple pathogen variants consecutively. For a given  
290 trial, the modelling outcomes were; i) MG consortia inhibited both *B. dendrobatidis* isolates  
291 more strongly than SG consortia; ii) SG consortia inhibited both *B. dendrobatidis* isolates  
292 more strongly than MG consortia; iii) MG inhibited the first *B. dendrobatidis* isolate more  
293 strongly than SG consortia, but not the second; iv) MG inhibited the second *B. dendrobatidis*  
294 isolate more strongly than SG consortia, but not the first. Applying the same MG consortium  
295 to two *B. dendrobatidis* isolates in series achieved stronger inhibition than SG consortia in  
296 49.4% [46.3 – 52.5%] of cases (i.e. modelling outcome i; null expectation 25% [0.5<sup>2</sup>],  
297  $p_{\text{RAND}} < 0.001$ ). This compared to only 7.9% [6.4-9.6%] of cases where SG consortia exhibited  
298 superior inhibition for both *B. dendrobatidis* isolates (i.e. modelling outcome iv). MG consortia  
299 provided superior inhibition for only one of the *B. dendrobatidis* isolates in the remaining 43%  
300 of cases (mean 20.3% and 22.4% of simulations with superior inhibition for the first and  
301 second isolate respectively). MG consortia exhibited strong inhibition (>50%) for both  
302 isolates in 14.7% [12.5-17%] of cases, compared to zero cases where SG isolates did so.  
303 Applying a single bacterial isolate instead of a SG or MG consortium resulted in strong  
304 inhibition for both *B. dendrobatidis* isolates in only 4% [2.9-5.3%] of cases (Fig. 4C).

305

## 306 DISCUSSION

307 The principal objectives of this study were two-fold: i) to determine the magnitude, if any, of  
308 phylogenetic signal in the ability of certain genera of bacteria to inhibit a broad range of  
309 *BdGPL* isolates; and ii) to examine the relative effectiveness of single bacteria and bacterial  
310 consortia to inhibit several isolates of *B. dendrobatidis*. We found no evidence of variation  
311 among bacterial genera in their ability to exhibit broad-range inhibition across multiple  
312 *BdGPL* isolates. Furthermore, our data suggested consortia provide superior *B.*  
313 *dendrobatidis* inhibition than individual bacteria, but critically this pattern is not uniform  
314 across pathogen isolates, and is contingent on consortium taxonomic diversity. Our results  
315 have important implications for our understanding of the factors determining *in vivo*  
316 resistance to infection in the wild, and provide novel insights into effective strategies for  
317 designing probiotic therapies to mitigate lethal cutaneous infections.

318

### 319 *Phylogenetic Signals of BdGPL Inhibition*

320 We detected no phylogenetic signal in the ability of individual bacterial genera to inhibit  
321 multiple *BdGPL* isolates. These data support previous work suggesting the ability to inhibit *B.*  
322 *dendrobatidis* is distributed widely over bacterial genera (Antwis et al 2015; Becker et al  
323 2015); several isolates demonstrated at least weak inhibition for all 10 *BdGPL*s but were  
324 spread across multiple genera with no clear pattern. That there is clear functional  
325 redundancy among genera in this host-protective trait suggests it is not prudent to focus on  
326 any one genus in the search for beneficial probiotics (Becker et al 2015), as highly divergent  
327 microbial communities can still possess similar functional traits (e.g. Bletz et al 2016). The  
328 principal source of variance in inhibition was among bacterial strains, with the number of  
329 isolates demonstrating broad-spectrum *facilitation* of *BdGPL* being roughly equal to the  
330 number exhibiting broad-scale *inhibition* of the pathogen. The phenomenon of *BdGPL* growth  
331 *facilitation* has been described previously for single pathogen isolates (Bell et al 2013;

332 Becker et al 2015), but crucially our results suggest that a bacterial strain's ability to facilitate  
333 the growth of *B. dendrobatidis* may extend across a broad suite of pathogen isolates.

334

335 It is unclear *why* some bacterial isolates facilitate *B. dendrobatidis* growth, but one likely  
336 explanation is that certain bacterial metabolites can act as growth substrates for fungi  
337 (Garbaya 1994; Hardoim et al 2015), or that different bacterial metabolites alter the abiotic  
338 environment (e.g. pH) to confer different growth rates (Romanowski et al 2011). Here we  
339 have provided some of the first evidence that facilitation of *B. dendrobatidis* growth is not  
340 simply a rare phenomenon arising from specific *BdGPL*/bacterial combinations, but that this  
341 is widespread across bacterial isolates, and different *BdGPL* isolates differ systematically in  
342 their growth rates when exposed to bacterial metabolites. That said, all four CORN isolates  
343 showed similar levels of inhibition across all bacterial isolates, whereas the two AUL isolates  
344 exhibited markedly different inhibition profiles (Figure 2). We identified one *BdGPL* isolate  
345 that was significantly prone to inhibition, and a further two isolates that demonstrated strong  
346 resistance to inhibition across the 58 bacterial isolates we tested. That there is variation in  
347 this trait among *BdGPL* isolates is intriguing; if facilitation occurs because *B. dendrobatidis*  
348 uses bacterial metabolites for nutrition, it may suggest some *B. dendrobatidis* variants can  
349 use those metabolites more efficiently for growth. Data gathered from additional isolates will  
350 allow us to formally test this hypothesis by probing whether a *BdGPL*'s susceptibility to  
351 inhibition or facilitation correlates with virulence. Previous work has shown no among-isolate  
352 variation in susceptibility of *B. dendrobatidis* to an echinocandin antifungal drug (Fisher et al  
353 2009), yet our data suggest this pattern is not the same for bacterial metabolites.

354 Recombination among lineages of *BdGPL* is common (Farrer et al 2011), providing a  
355 mechanism whereby metabolic genes favouring enhanced growth may be spread following  
356 contact among lineages. Our data have two important implications given the proclivity of *B.*  
357 *dendrobatidis* for recombination. First, among-isolate variation in susceptibility to inhibition  
358 suggests that the relative efficacy of probiotic or curative therapies in the wild will be modified

359 by local *B. dendrobatidis* genotype. Second, though we tend to treat bacterial inhibition  
360 scores as fixed traits, this ignores the ability of genetic recombination among *B.*  
361 *dendrobatidis* lineages to modify the relationship between bacterial metabolites and  
362 pathogen growth rates. Even the application of probiotics themselves may represent a strong  
363 selective pressure favouring genetic variants of *B. dendrobatidis* that lack susceptibility to  
364 those probiotics. Although several trials have demonstrated the potential for probiotic  
365 prophylaxis against *B. dendrobatidis* (e.g. Harris 2009; Muletz et al 2012; Kueneman et al  
366 2016), we still lack the requisite data to measure selection caused by those trials on the  
367 pathogen. *In vitro* experimental evolution assays between pathogen and bacteria may prove  
368 the most powerful means for detecting such patterns.

369

#### 370 *Consortium-Based Approaches to Combatting Fungal Pathogens*

371 Our results revealed a positive link between the taxonomic richness of a probiotic consortium  
372 and its ability to inhibit *B. dendrobatidis* growth, but crucially this relationship was highly  
373 dependent on *B. dendrobatidis* isolate. Multi-genus consortia outperformed both single-  
374 genus consortia and single bacterial isolates in *B. dendrobatidis* inhibition, and were far more  
375 likely to produce strong inhibition of 50% or greater, but only for two of the three pathogen  
376 variants.

377

378 The general relationship between inhibition and consortium diversity was in the expected  
379 direction; low community relatedness (i.e. high community dissimilarity) and high species  
380 richness both increase the resistance of a bacterial community to pathogenic 'invaders' (e.g.  
381 Jousset et al 2011; Eisenhauer et al 2012, 2013). Furthermore, previous work has linked  
382 higher species diversity of probiotic consortia to increased *B. dendrobatidis* inhibition using a  
383 single pathogen isolate (Piova-Scott et al 2017). Superior inhibition from consortia, rather  
384 than single isolates, may arise as a by-product of the interference competition over resources



385 created by co-culture (Scheuring & Yu 2012). Thus, even bacteria that are weak inhibitors  
386 when grown individually can increase the overall inhibitory power of a consortium by creating  
387 a competitive environment that favours greater production of anti-fungal compounds.  
388 Functional dissimilarity has been proposed as more important than taxonomic diversity in  
389 predicting a community's resilience to invasion (Eisenhauer et al 2013), but may explain why  
390 single-genus consortia did not perform as well as multi-genus consortia. In selecting for  
391 genetic diversity, we may have been simultaneously selecting for functional diversity not  
392 present when co-culturing three members of the same genus.

393

394 That *B. dendrobatidis* isolate can alter the strength of the relationship between consortium  
395 diversity and inhibition is a highly novel finding. Our simulated probiotic trials revealed that for  
396 two *B. dendrobatidis* isolates, combining bacteria into multi-genus consortia yielded  
397 significantly better inhibition than applying one of the member bacteria in isolation. These  
398 results provide further support for a synergistic effect of co-culture on inhibition. If multi-  
399 genus consortia were no better at inhibition than the mean of their composite members,  
400 Monte Carlo integration over all single isolate scores would not have recovered a significant  
401 difference between the two groups. Yet, for *BdGPL* MODS28 and *BdCAPE* TF5a1, multi-  
402 genus consortia yielded by far the highest probability of observing strong inhibition of 50% or  
403 more. That this pattern was not conserved for *BdGPL* SFBC019 is perhaps the most  
404 intriguing finding. As for *BdGPL* variants JEL423 and AUL2 in the phylogenetic trials,  
405 SFBC019 was largely resistant to inhibition, with individual bacterial inhibition scores that  
406 were often negative. One possible explanation for the lack of efficacy of consortia against  
407 SFBC019 is that the when a variant of *B. dendrobatidis* is resistant to inhibition and/or there  
408 is little variation in inhibition, co-culture fails to produce any synergistic inhibitory effects. That  
409 is, if a pathogen is highly resistant to most bacterial metabolites in the first instance,  
410 increases in the relative concentrations of those metabolites through co-culture-mediated  
411 competition are unlikely to elicit any significant increases in inhibitory capability. The most

412 important consequence of this pattern is that for some pathogenic variants, multi-genus  
413 consortia are highly unlikely to be able to yield high inhibition in cases where individual  
414 isolates have failed to do so. Despite the observed variance in success of consortia across  
415 *B. dendrobatidis* isolates, our simulation trials revealed that multi-genus consortia offer the  
416 best broad-spectrum protection across multiple *B. dendrobatidis* isolates encountered in  
417 series. This finding is important; human-mediated spread of *B. dendrobatidis* through the  
418 amphibian trade (Fisher & Garner 2007) means we cannot assume that local populations will  
419 be exposed to only one pathogenic variant. Successful mitigation of the pathogen in the wild  
420 demands that we employ strategies with the highest broad-spectrum success over multiple  
421 pathogen genotypes.

422

#### 423 *Conclusion*

424 This study adds to a growing body of evidence suggesting that diverse, multi-species  
425 consortia may represent powerful disease mitigation tools, offering superior probiotic  
426 protection against disease compared to single bacterial isolates. Our work has highlighted  
427 that different isolates of a pathogen can modify the strength of inhibition caused by the  
428 probiotic, meaning we cannot expect probiotic effectiveness to be uniform across the genetic  
429 landscape of the pathogen. Despite the relative merits of multi-genus consortia for mitigating  
430 single and multiple *B. dendrobatidis* variants, it remains to be determined how readily these  
431 consortia will be able to colonise the host skin *in vivo*. This is crucial for to being able to  
432 quantify how applicable inhibition measures derived *in vitro* are to real-world scenarios.  
433 Nevertheless, our data highlight the merits of a community-level approach to probiotic  
434 mitigation of wildlife disease, which may offer more broad-spectrum host protection in the  
435 face of large-scale heterogeneity in pathogen genotype.

436

437

438 **ACKNOWLEDGEMENTS**

439 This study was partly funded by a North-West University Postdoctoral Research Fellowship  
440 awarded to REA. XAH was funded by an Institute of Zoology Research Fellowship. The  
441 authors would like to thank Prof. Richard Preziosi and Dr. Trenton Garner for additional  
442 provision of consumables, and Prof. Ché Weldon, Dr. Trenton Garner and Prof. Matthew  
443 Fisher for access to *Batrachochytrium dendrobatidis* isolates used in this study.

444

445

446

447

448 **REFERENCES**

449 Antwis, R.E., Preziosi, R.F., Harrison, X.A., Garner, T.W. (2015). Amphibian symbiotic  
450 bacteria do not show a universal ability to inhibit growth of the global panzootic lineage of  
451 *Batrachochytrium dendrobatidis*. *Applied and Environmental Microbiology*, 81, 3706-3711.

452

453 Bates, D., Maechler, M., Bolker, B., Walker, S. (2015). Fitting Linear Mixed-Effects Models  
454 Using lme4. *Journal of Statistical Software*, 67, 1-48. doi:10.18637/jss.v067.i01.

455

456 Becker, M.H., Walke, J.B., Murrill, L., Woodhams, D.C., Reinert, L.K., Rollins-Smith, L.A., et  
457 al. (2015). Phylogenetic distribution of symbiotic bacteria from Panamanian amphibians that  
458 inhibit growth of the lethal fungal pathogen *Batrachochytrium dendrobatidis*. *Molecular*  
459 *Ecology*, 24, 1628-1641.

460

461 Bell, S.C., Alford, R.A., Garland, S., Padilla, G., Thomas, A.D. (2013). Screening bacterial  
462 metabolites for inhibitory effects against *Batrachochytrium dendrobatidis* using a  
463 spectrophotometric assay. *Diseases of Aquatic Organisms*, 103, 77-85.

464

465 Bletz, M.C., Loudon, A.H., Becker, M.H., Bell, S.C., Woodhams, D.C., Minbiole, K.P. et al.  
466 (2013). Mitigating amphibian chytridiomycosis with bioaugmentation: characteristics of  
467 effective probiotics and strategies for their selection and use. *Ecology letters*, 16, 807-20.

468

469 Bletz, M.C., Goedbloed, D.J., Sanchez, E., Reinhardt, T., Tebbe, C.C., Bhujju, S., et al.  
470 (2016). Amphibian gut microbiota shifts differentially in community structure but converges  
471 on habitat-specific predicted functions. *Nature Communications*, 7.

472

473 Cohen, J. M., Venesky, M. D., Sauer, E. L., Civitello, D. J., McMahon, T. A., Roznik, E. A. et  
474 al. (2017). The thermal mismatch hypothesis explains host susceptibility to an emerging  
475 infectious disease. *Ecology Letters*, 20, 184–193. doi:10.1111/ele.12720

476

477 de Jong, M.D., Hien, T.T. (2006). Avian influenza A (H5N1). *Journal of Clinical Virology*, 35,  
478 2-13.

479

480 Dillon, R.J., Vennard, C.T., Buckling, A., Charnley, A.K. (2005). Diversity of locust gut  
481 bacteria protects against pathogen invasion. *Ecology Letters*, 8, 1291-8.

482

483 Doddington, B.J., Bosch, J., Oliver, J.A., Grassly, N.C., Garcia, G., Schmidt, B.R., et al.  
484 (2013), Context-dependent amphibian host population response to an invading pathogen.  
485 *Ecology*, 94, 1795-1804.

486

487 Eisenhauer, N., Scheu, S., Jousset, A. (2012). Bacterial diversity stabilizes community  
488 productivity. *PloS one*, 7, e34517.

489

490 Eisenhauer, N., Schulz, W., Scheu, S., Jousset, A., Pfrender, M. (2013). Niche  
491 dimensionality links biodiversity and invasibility of microbial communities. *Functional*  
492 *Ecology*, 27, 282-8.

493

494 Farrer, R.A., Weinert, L.A., Bielby, J., Garner, T.W., Balloux, F., Clare, F., et al. (2011)  
495 Multiple emergences of genetically diverse amphibian-infecting chytrids include a globalized

496 hypervirulent recombinant lineage. Proceedings of the National Academy of Sciences of the  
497 United States of America, 108, 18732-6.

498

499 Farrer, R.A., Henk, D.A., Garner, T.W., Balloux, F., Woodhams, D.C., Fisher, M.C. (2013).  
500 Chromosomal copy number variation, selection and uneven rates of recombination reveal  
501 cryptic genome diversity linked to pathogenicity. PLoS Genetics, 9, p. e1003703.

502

503 Fisher, M.C., Garner, T.W.J. (2007) The relationship between the emergence of  
504 *Batrachochytrium dendrobatidis*, the international trade in amphibians and introduced  
505 amphibian species. Fungal Biology Reviews, 21, 2-9.

506

507 Fisher, M.C., Bosch, J., Yin, Z., Stead, D.A., Walker, J., Selway, L., et al. (2009) Proteomic  
508 and phenotypic profiling of the amphibian pathogen *Batrachochytrium dendrobatidis* shows  
509 that genotype is linked to virulence. Molecular ecology, 18, 415-29.

510

511 Fisher, M.C., Henk, D.A., Briggs, C.J., Brownstein, J.S., Madoff, L.C., McCraw, S.L., et al.  
512 (2012). Emerging fungal threats to animal, plant and ecosystem health. Nature Reviews,  
513 484, 186-194.

514

515 Garbaye, J. (1994). Helper bacteria: a new dimension to the mycorrhizal symbiosis. New  
516 Phytologist, 128, 197-210.

517

518 Garner, T.W., Schmidt, B.R., Martel, A., Pasmans, F., Muths, E., Cunningham, A.A., et al.  
519 (2016). Mitigating amphibian chytridiomycoses in nature. Phil. Trans. R. Soc. B, 371,  
520 20160207.

521

522 Geweke, J. (1992) Evaluating the accuracy of sampling-based approaches to calculating  
523 posterior moments. In *Bayesian Statistics 4* (ed JM Bernardo, JO Berger, AP Dawid and AFM  
524 Smith). Clarendon Press, Oxford, UK.

525

526 Goka, K., Yokoyama, J., Une, Y., Kuroki, T., Suzuki, K., Nakahara, M., et al. (2009).  
527 Amphibian chytridiomycosis in Japan: distribution, haplotypes and possible route of entry into  
528 Japan. *Molecular Ecology*, 18, 4757-74.

529

530 Hadfield, J.D. (2010). MCMC Methods for Multi-Response Generalized Linear Mixed Models:  
531 The MCMCglmm R Package. *Journal of Statistical Software*, 33(2), 1-22. URL:  
532 <http://www.jstatsoft.org/v33/i02/>.

533

534 Hardoim, P.R., van Overbeek, L.S., Berg, G., Pirttilä, A.M., Compant, S., Campisano, A., et  
535 al. (2015). The hidden world within plants: ecological and evolutionary considerations for  
536 defining functioning of microbial endophytes. *Microbiology and Molecular Biology Reviews*,  
537 79, 293-320. doi:10.1128/MMBR.00050-14.

538

539 Harris, R.N., Lauer, A., Simon, M.A., Banning, J.L., Alford, R.A. (2009). Addition of antifungal  
540 skin bacteria to salamanders ameliorates the effects of chytridiomycosis. *Diseases of Aquatic  
541 Organisms*, 83, 11-16.

542

543 Hoyt, J.R., Cheng, T.L., Langwig, K.E., Hee, M.M., Frick, W.F., Kilpatrick, A.M. (2015).  
544 Bacteria isolated from bats inhibit the growth of *Pseudogymnoascus destructans*, the  
545 causative agent of white-nose syndrome. *PLoS One*, 10, e0121329.

546

547 Jani, A.J., Briggs, C.J. (2014). The pathogen *Batrachochytrium dendrobatidis* disturbs the  
548 frog skin microbiome during a natural epidemic and experimental infection. *Proceedings of*  
549 *the National Academy of Sciences of the United States of America*, 111, E5049-58.

550

551 Jenkinson, T.S., Betancourt Román, C.M., Lambertini, C., Valencia-Aguilar, A., Rodriguez,  
552 D., Nunes-de-Almeida, C.H., et al. (2016) Amphibian-killing chytrid in Brazil comprises both  
553 locally endemic and globally expanding populations. *Molecular Ecology*, 25, 2978–2996.

554

555 Jousset, A., Schmid, B., Scheu, S., Eisenhauer, N. (2011). Genotypic richness and  
556 dissimilarity opposingly affect ecosystem functioning. *Ecology Letters*, 14, 537-45.

557

558 Kueneman, J.G., Woodhams, D.C., Harris, R., Archer, H.M., Knight, R., McKenzie, V.J.,  
559 (2016) Probiotic treatment restores protection against lethal fungal infection lost during  
560 amphibian captivity. *Proc. R. Soc. B*, 283, 1839.

561

562 Martel, A., Spitzen-van der Sluijs, A., Blooi, M., Bert, W., Ducatelle, R., Fisher, M.C., et al.  
563 (2013). *Batrachochytrium salamandrivorans* sp. nov. causes lethal chytridiomycosis in  
564 amphibians. *Proceedings of the National Academy of Sciences*, 110, 15325-15329.

565

566 Martel, A., Blooi, M., Adriaensen, C., Van Rooij, P., Beukema, W., Fisher, M.C., et al. (2014).  
567 Recent introduction of a chytrid fungus endangers Western Palearctic  
568 salamanders. *Science*, 346, 630-631.

569



570 Matos, A., Kerkhof, L., Garland, J.L. (2005). Effects of microbial community diversity on the  
571 survival of *Pseudomonas aeruginosa* in the wheat rhizosphere. *Microbial Ecology*, 49, 257-  
572 64.

573

574 McCallum, H. (2012) Disease and the dynamics of extinction. *Philos Trans R Soc Lond B*  
575 *Biol Sci* 367: 2828–2839. doi: 10.1098/rstb.2012.0224. pmid:22966138

576

577 Morgan, J.A., Vredenburg, V.T., Rachowicz, L.J., Knapp, R.A., Stice, M.J., Tunstall, T., et al.  
578 (2007). Population genetics of the frog-killing fungus *Batrachochytrium dendrobatidis*.  
579 *Proceedings of the National Academy of Sciences of the United States of America*, 104,  
580 13845-50.

581

582 Muletz, C.R., Myers, J.M., Domangue, R.J., Herrick, J.B., Harris, R.N. (2012). Soil  
583 bioaugmentation with amphibian cutaneous bacteria protects amphibian hosts from infection  
584 by *Batrachochytrium dendrobatidis*. *Biological Conservation*, 152, 119-126.

585

586 Olson, D.H., Aanensen, D.M., Ronnenberg, K.L., Powell, C.I., Walker, S.F., Bielby, J., et al.  
587 (2013). Mapping the global emergence of *Batrachochytrium dendrobatidis*, the amphibian  
588 chytrid fungus. *PloS one*, 8, e56802.

589

590 Piovio-Scott, J., Rejmanek, D., Woodhams, D. C., Worth, S. J., Kenny, H., McKenzie, V., et  
591 al. (2017). Greater Species Richness of Bacterial Skin Symbionts Better Suppresses the  
592 Amphibian Fungal Pathogen *Batrachochytrium Dendrobatidis*. *Microbiology Ecology*, DOI  
593 10.1007/s00248-016-0916-4.

594

595 R Core Team. (2016). R: A language and environment for statistical computing. R  
596 Foundation for Statistical Computing, Vienna, Austria. URL <https://www.R-project.org/>.  
597  
598 Rebollar, E.A., Antwis, R.E., Becker, M.H., Belden, L.K., Bletz, M.C., Brucker, R.M., et al.  
599 (2016). Using "Omics" and Integrated Multi-Omics Approaches to Guide Probiotic Selection  
600 to Mitigate Chytridiomycosis and Other Emerging Infectious Diseases. *Frontiers in*  
601 *Microbiology*, 7, 68.  
602  
603 Rodriguez, D., Becker, C. G., Pupin, N.C., Haddad, C.F.B., Zamudio, K. R. (2014). Long-  
604 term endemism of two highly divergent lineages of the amphibian-killing fungus in the Atlantic  
605 Forest of Brazil. *Molecular Ecology*, 23, 774-87.  
606  
607 Romanowski, K., Zaborin, A., Fernandez, H., Poroyko, V., Valuckaite, V., Gerdes, S., et al.  
608 (2011). Prevention of siderophore- mediated gut-derived sepsis due to *P. aeruginosa* can be  
609 achieved without iron provision by maintaining local phosphate abundance: role of pH. *BMC*  
610 *Microbiology*, 11: 212  
611  
612 Rosenblum, E.B., James, T.Y., Zamudio, K.R., Poorten, T.J., Ilut, D., Rodriguez, D., et al.  
613 (2013). Complex history of the amphibian-killing chytrid fungus revealed with genome  
614 resequencing data. *Proceedings of the National Academy of Sciences of the United States of*  
615 *America*, 110, 9385-90.  
616  
617 Scheuring, I., Yu, D.W. (2012). How to assemble a beneficial microbiome in three easy  
618 steps. *Ecology Letters*, 15, 1300-7.  
619

- 620 Schock, D.M., Bollinger, T.K., Collins, J.P. (2009). Mortality rates differ among amphibian  
621 populations exposed to three strains of a lethal ranavirus. *EcoHealth*, 6, 438-48.  
622
- 623 Schloegel, L.M., Toledo, L.F., Longcore, J.E., Greenspan, S.E., Vieira, C.A., Lee, M., et al.  
624 (2012) Novel, panzootic and hybrid genotypes of amphibian chytridiomycosis associated with  
625 the bullfrog trade. *Molecular Ecology*, 21, 5162-77.  
626
- 627 Skerratt, L.F., Berger, L., Speare, R., Cashins, S., McDonald, K.R., et al. (2007) Spread of  
628 chytridiomycosis has caused the rapid global decline and extinction of frogs. *Ecohealth* 4:  
629 125–134.  
630
- 631 Sleeman, J.M. (2013). Has the time come for big science in wildlife health? *EcoHealth*, 10,  
632 335-338.  
633
- 634 Tompkins, D.M., Carver, S., Jones, M.E., Krkošek, M., Skerratt, L.F. (2015). Emerging  
635 infectious diseases of wildlife: a critical perspective. *Trends in Parasitology*, 31, 149-159.  
636
- 637 van Elsas, J.D., Chiurazzi, M., Mallon, C.A., Elhottova, D., Kristufek, V., Salles, J.F. (2012).  
638 Microbial diversity determines the invasion of soil by a bacterial pathogen. *Proceedings of*  
639 *the National Academy of Sciences of the United States of America*, 109, 1159-64.  
640
- 641 Walke, J.B., Becker, M.H., Loftus, S.C., House, L.L., Teotonio, T.L., Minbiole, K.P. et al.  
642 (2015). Community Structure and Function of Amphibian Skin Microbes: An Experiment with  
643 Bullfrogs Exposed to a Chytrid Fungus. *PloS one*, 10, e0139848.  
644

645 Woodhams, D.C., Brandt, H., Baumgartner, S., Kielgast, J., Küpfer, E., Tobler, U., et al.  
646 (2014). Interacting symbionts and immunity in the amphibian skin mucosome predict disease  
647 risk and probiotic effectiveness. *PLoS One*, 9(4), p.e96375.

648

649

650 **Table 1**

651 *Batrachochytrium dendrobatidis* isolates used in the study.

652

653

654 **Table 2**

655 Composition of multi-genus consortia used in the study. Single-genus consortia comprised all  
656 three bacterial isolates (A, B and C) for a given genus (*Acinetobacter*, *Chryseobacterium*,  
657 *Serratia*, *Stentrophomonas*).

658

659

660

661 **Table 3**

662 Mean Proportion of 10 *Bd*GPL isolates for which at least weak inhibitory capability was  
663 observed, averaged over all bacterial isolates in a genus. 95% CI: 95% confidence intervals  
664 from an overdispersion-corrected Binomial GLM.

665

666

667

668

669

670 **Figure 1. Inhibition scores of 58 bacterial strains from 10 genera when tested against**

671 **10 *Bd*GPL isolates.**

672 Estimates are derived from a Bayesian mixed effects model with bacterial isolate nested

673 within genus, and *Bd*GPL isolate fitted as random effects. Points are conditional modes of

674 the individual isolate random effects, marginalised with respect to *Bd*GPL isolate. Error bars

675 are 95% credible intervals.

676



677

678

679

680 **Figure 2. Inhibition scores of 10 *Bd*GPL isolates**

681 Estimates are derived from a Bayesian mixed effects model with bacterial isolate nested  
682 within genus, and *Bd*GPL isolate fitted as random effects. Points are conditional modes of  
683 the individual *Bd*GPL isolate random effects, marginalised with respect to bacterial isolate.  
684 Error bars are 95% credible intervals.

685

686

687

688 **Figure 3.** Inhibition scores for Single-Genus and Multi-Genus Consortia across three *B.*

689 *dendrobatidis* isolates (*Bd*GPL MODS28.1, *Bd*GPL SFBC019 and *Bd*CAPE TF5a1).

690 Points have been jittered for display purposes.

691

692

693

694 **Figure 4. Simulation results examining the relative efficacy of different probiotic**

695 **strategies**

696 (A) the probability of Multi-Genus Consortia (MGC) yielding higher inhibition compared to

697 Single-Genus Consortia (SGC) or a Single Bacterial Isolate (Single); (B) the probability of

698 MGC, SGC or Single bacteria yielding inhibition > 50% when applied to each of three *B.*

699 *dendrobatidis* isolates; (C) The probability of an individual consortium type yielding >50%

700 inhibition when applied to two randomly chosen *B. dendrobatidis* isolates in series.

701

702

| Isolate   | Lineage | Geographic origin                       | Host species                   | Collector      | Year | Phylogeny screening |
|-----------|---------|-----------------------------------------|--------------------------------|----------------|------|---------------------|
| MG04      | GPL     | Silver Mine, Western Cape, South Africa | <i>Amietia fuscigula</i>       | Trenton Garner | 2010 | X                   |
| CORN2.2   | GPL     | Penhale Farm, Cornwall, UK              | <i>Ichthyosaurus alpestris</i> | Trenton Garner | 2012 | X                   |
| CORN2.3   | GPL     | Penhale Farm, Cornwall, UK              | <i>Ichthyosaurus alpestris</i> | Trenton Garner | 2012 | X                   |
| CORN3.1   | GPL     | Penhale Farm, Cornwall, UK              | <i>Ichthyosaurus alpestris</i> | Trenton Garner | 2012 | X                   |
| CORN3.2   | GPL     | Penhale Farm, Cornwall, UK              | <i>Ichthyosaurus alpestris</i> | Trenton Garner | 2012 | X                   |
| AUL1.2    | GPL     | Lac d'Aule, France                      | <i>Alytes obstetricans</i>     | Matthew Fisher | 2010 | X                   |
| AUL2      | GPL     | Lac d'Aule, France                      | <i>Alytes obstetricans</i>     | Matthew Fisher | 2010 | X                   |
| IA2011    | GPL     | Ibon Acherito, Spain                    | <i>Alytes obstetricans</i>     | Matthew Fisher | 2011 | X                   |
| MODS 28.1 | GPL     | Mont Olia, Sardinia                     | <i>Discoglossus sardus</i>     | Trenton Garner | 2010 | X                   |
| JEL423    | GPL     | Guabal, Panama                          | <i>Agalychnis lemur</i>        | Joyce Longcore | 2004 | X                   |
| SFBC019   | GPL     | Sellafield, Cumbria, UK                 | <i>Epidalea calamita</i>       | Peter Minting  | 2010 |                     |
| TF5a1     | CAPE    | Torrent des Ferrerets, Mallorca         | <i>Alytes muletensis</i>       | Matthew Fisher | 2007 |                     |



| <b>Inter-genera mix 1</b> | <b>Inter-genera mix 2</b> | <b>Inter-genera mix 3</b> | <b>Inter-genera mix 4</b> |
|---------------------------|---------------------------|---------------------------|---------------------------|
| <i>Chryseobacterium B</i> | <i>Acinetobacter C</i>    | <i>Acinetobacter A</i>    | <i>Acinetobacter B</i>    |
| <i>Serratia B</i>         | <i>Serratia C</i>         | <i>Chryseobacterium A</i> | <i>Chryseobacterium C</i> |
| <i>Stentrophomonas B</i>  | <i>Stentrophomonas C</i>  | <i>Serratia A</i>         | <i>Stentrophomonas A</i>  |

| <b>Genus</b>          | <b>Number Isolates</b> | <b>Mean Proportion <i>BdGPL</i> Inhibition</b> | <b>95% CI</b> |
|-----------------------|------------------------|------------------------------------------------|---------------|
| <i>Acinetobacter</i>  | 6                      | 0.33                                           | 0.1-0.65      |
| <i>hryseobacteriu</i> | 8                      | 0.5                                            | 0.24-0.76     |
| <i>Citrobacter</i>    | 3                      | 0.67                                           | 0.24-0.95     |
| <i>Comamonas</i>      | 4                      | 0.7                                            | 0.32-0.95     |
| <i>Enterobacter</i>   | 11                     | 0.54                                           | 0.31-0.75     |
| <i>Microbacterium</i> | 4                      | 0.4                                            | 0.1-0.77      |
| <i>Sanguibacter</i>   | 3                      | 0.63                                           | 0.21-0.94     |
| <i>Serratia</i>       | 6                      | 0.47                                           | 0.19-0.76     |
| <i>Staphylococcus</i> | 4                      | 0.73                                           | 0.34-0.96     |
| <i>enotrophomon</i>   | 9                      | 0.49                                           | 0.25-0.73     |

Genus: Bacterial Isolate

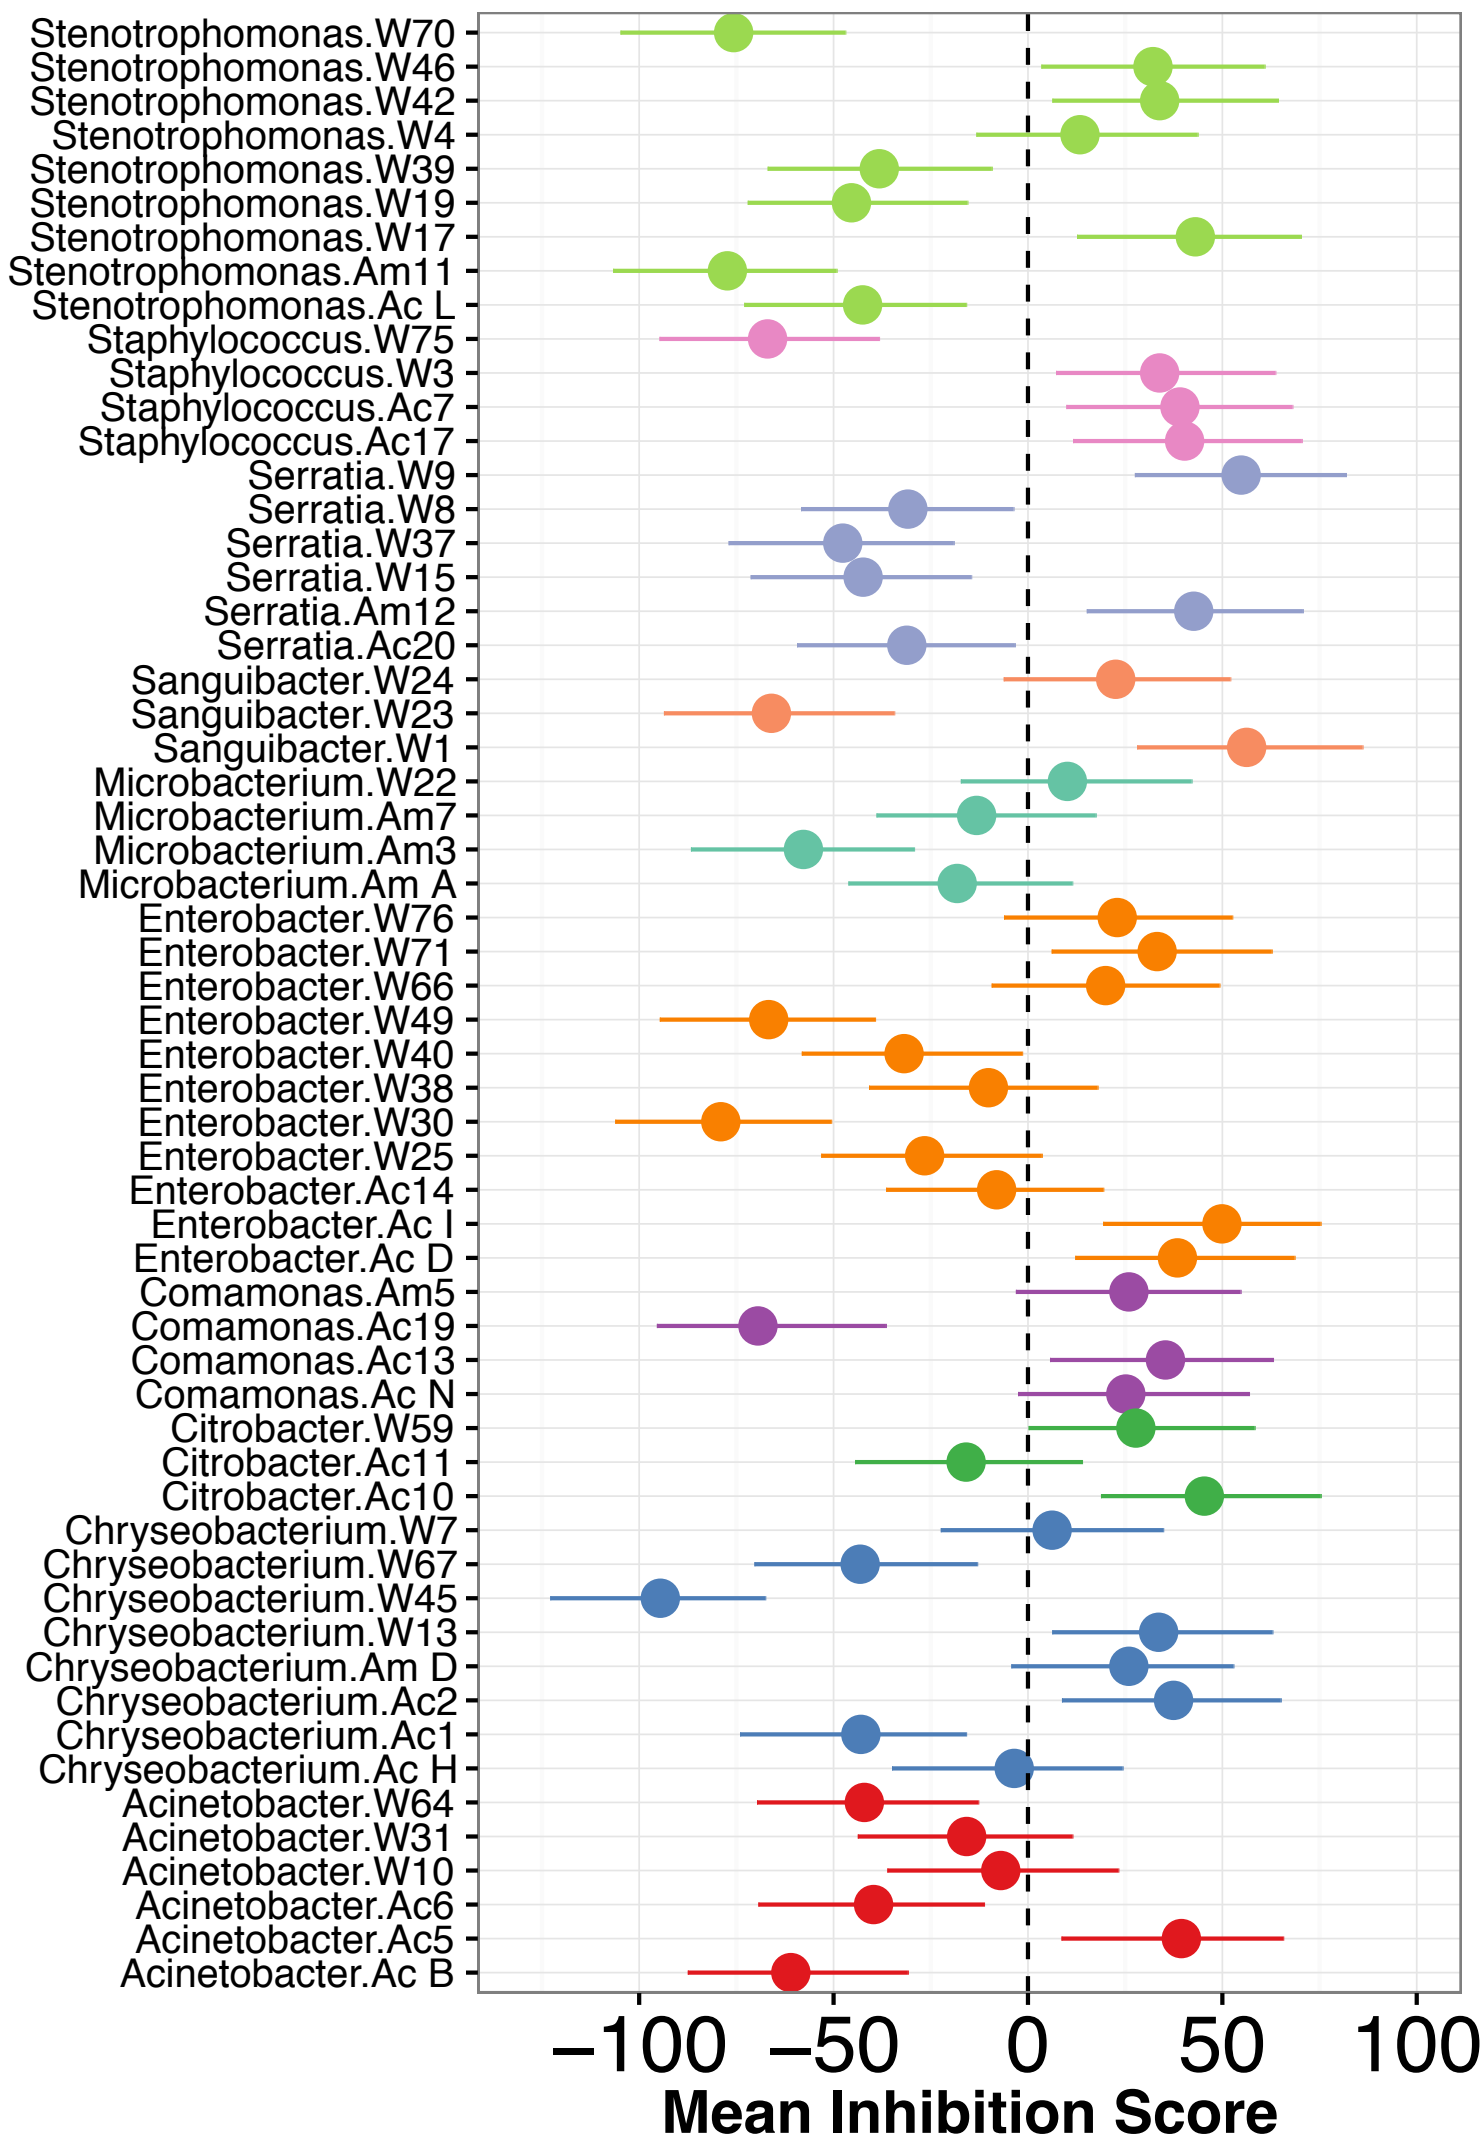



Figure 2

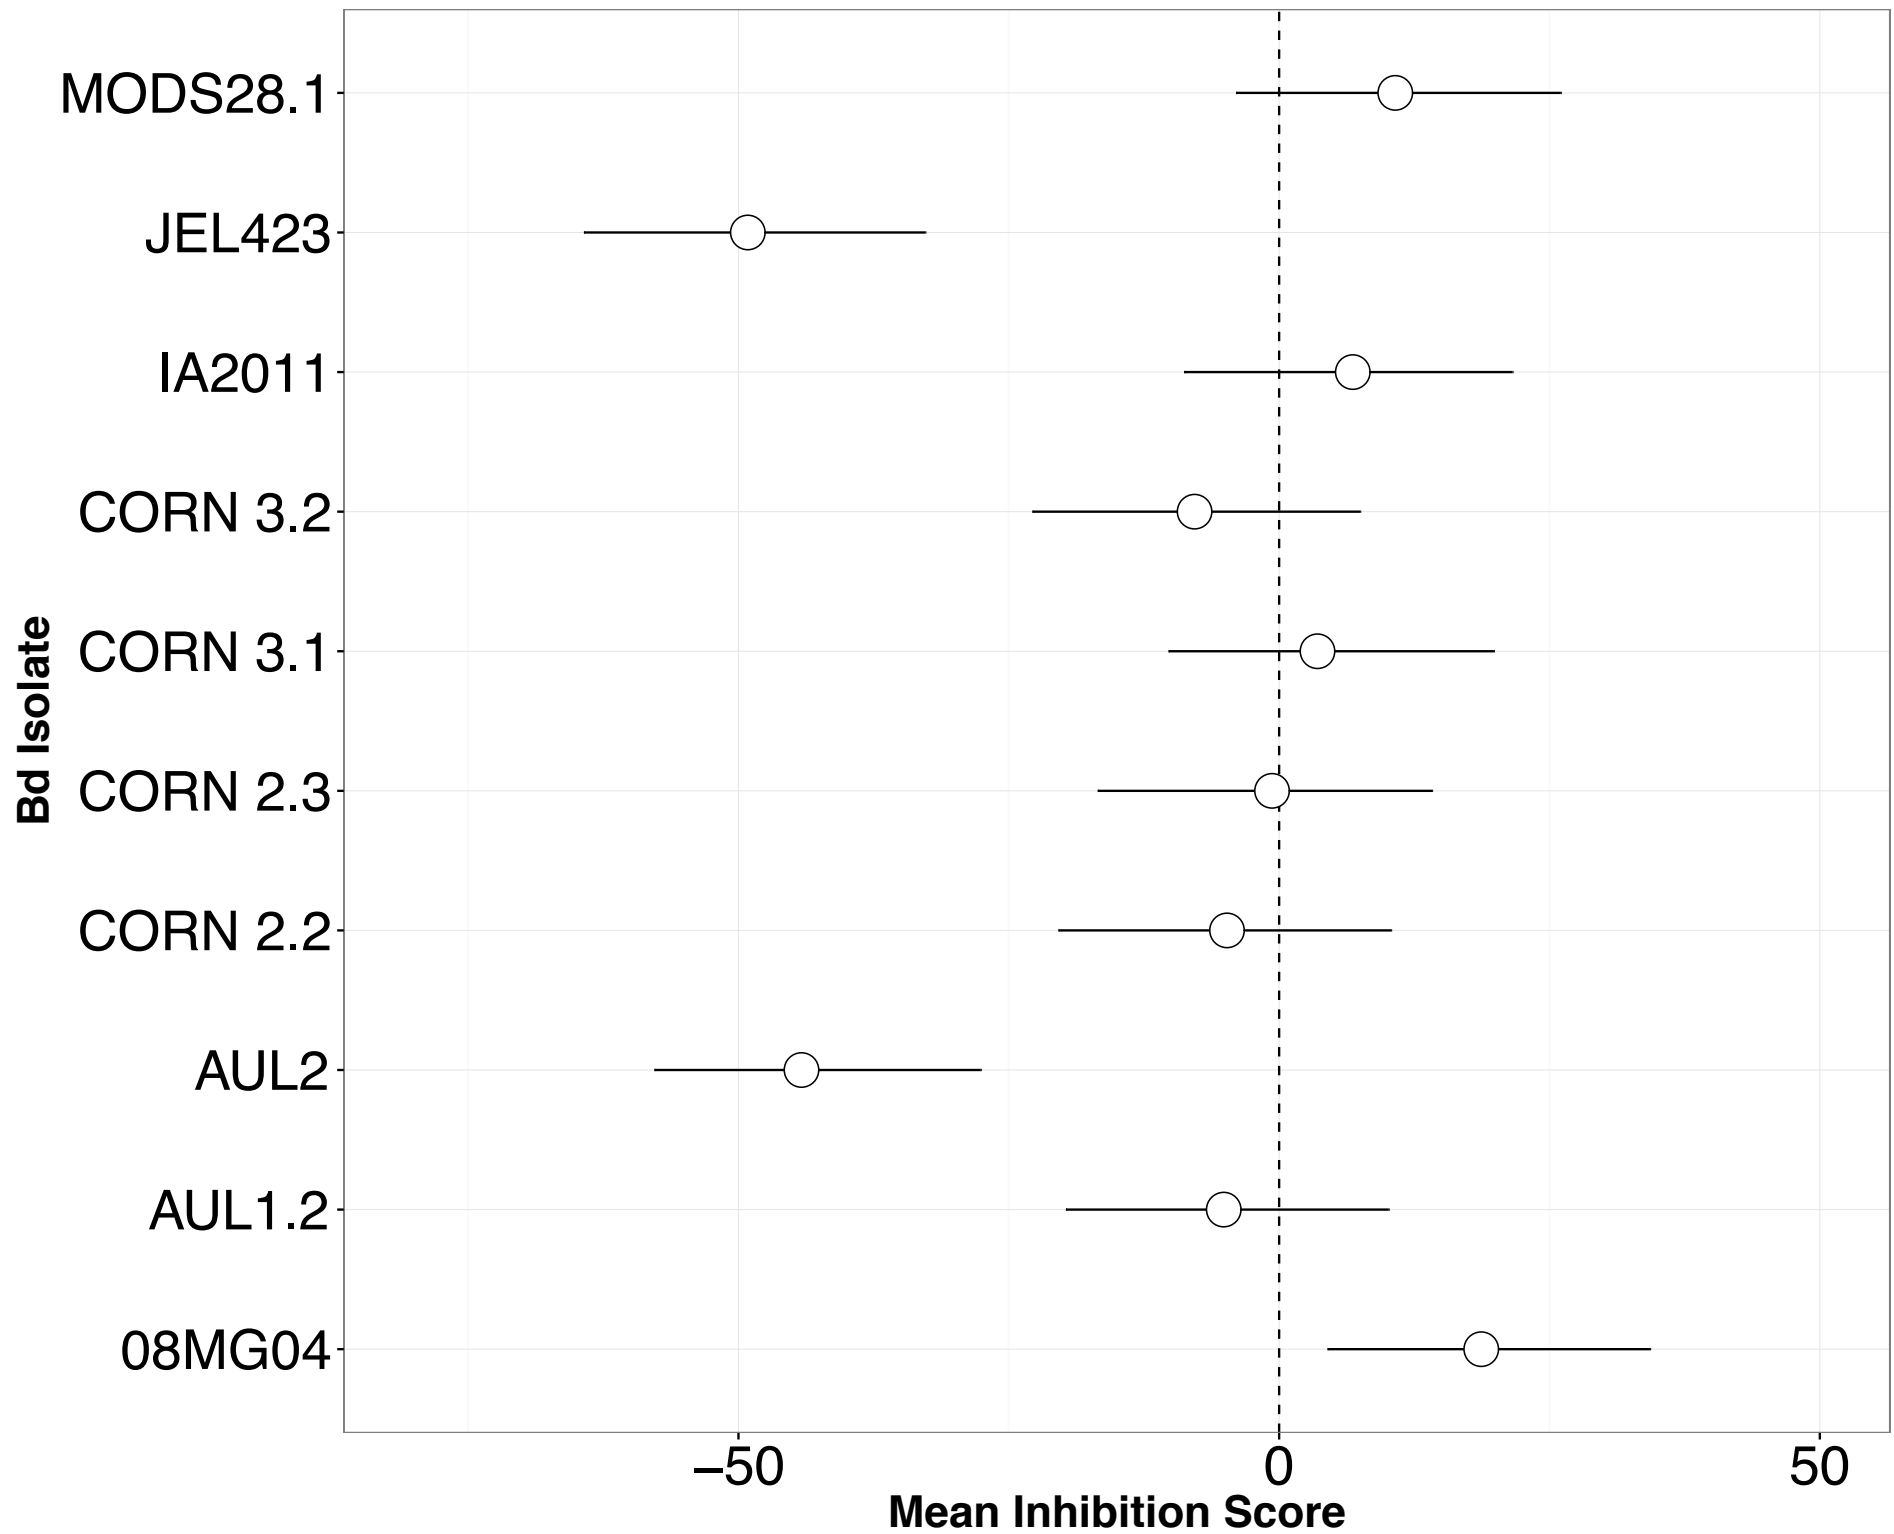

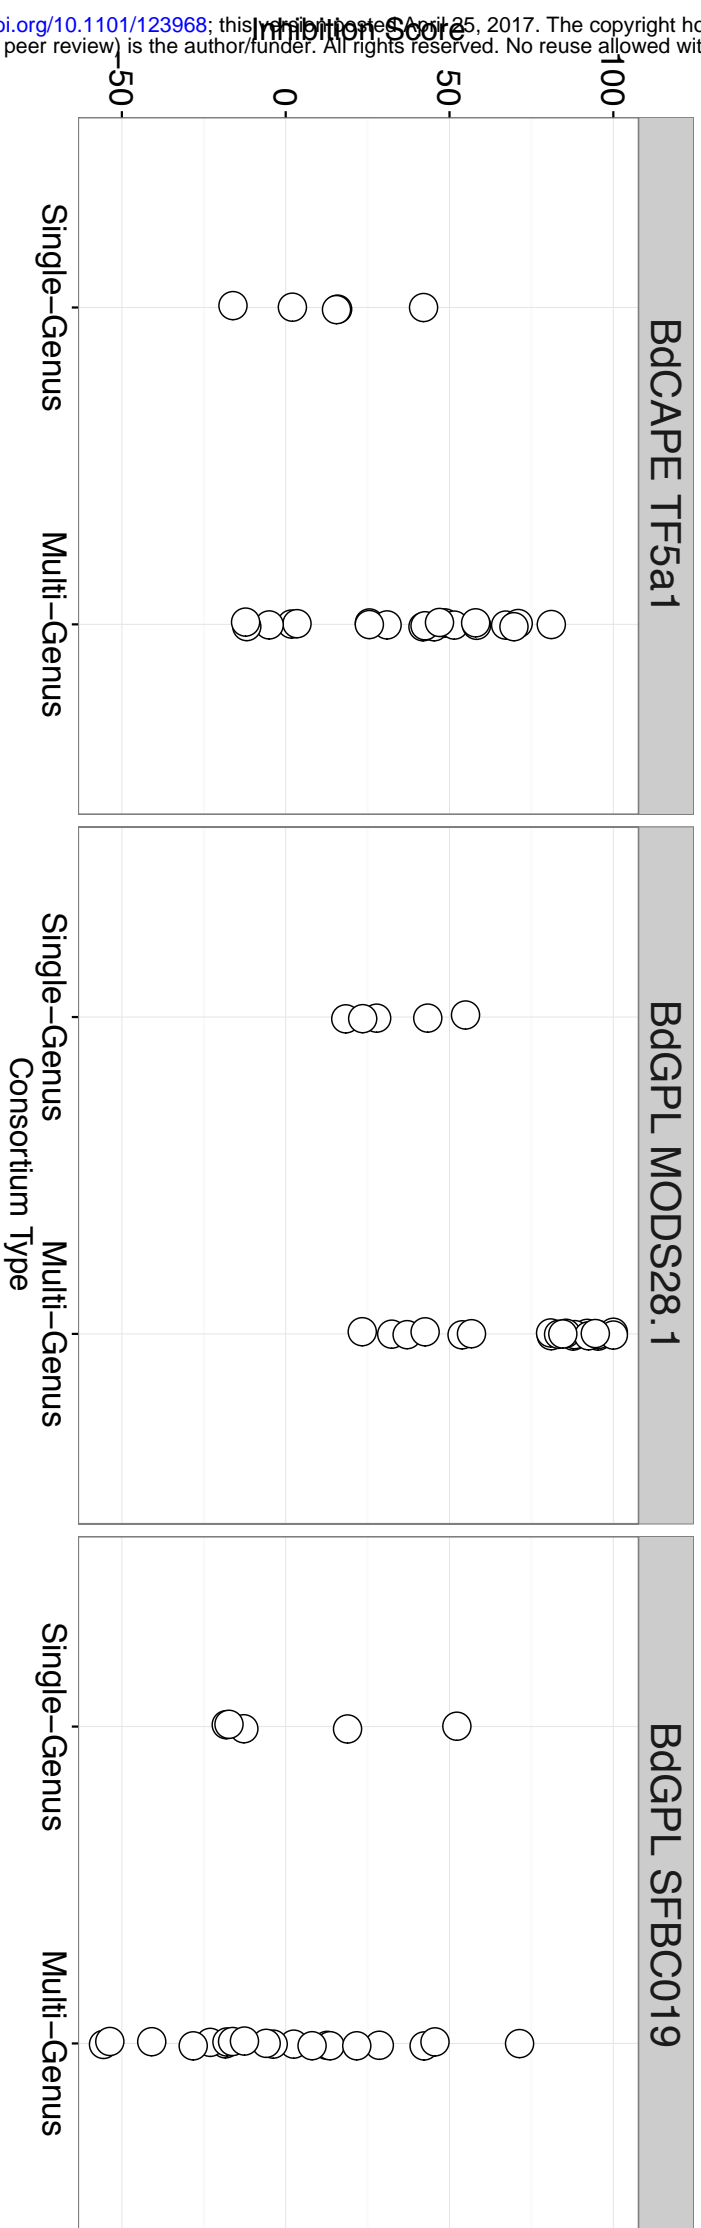

Figure 3

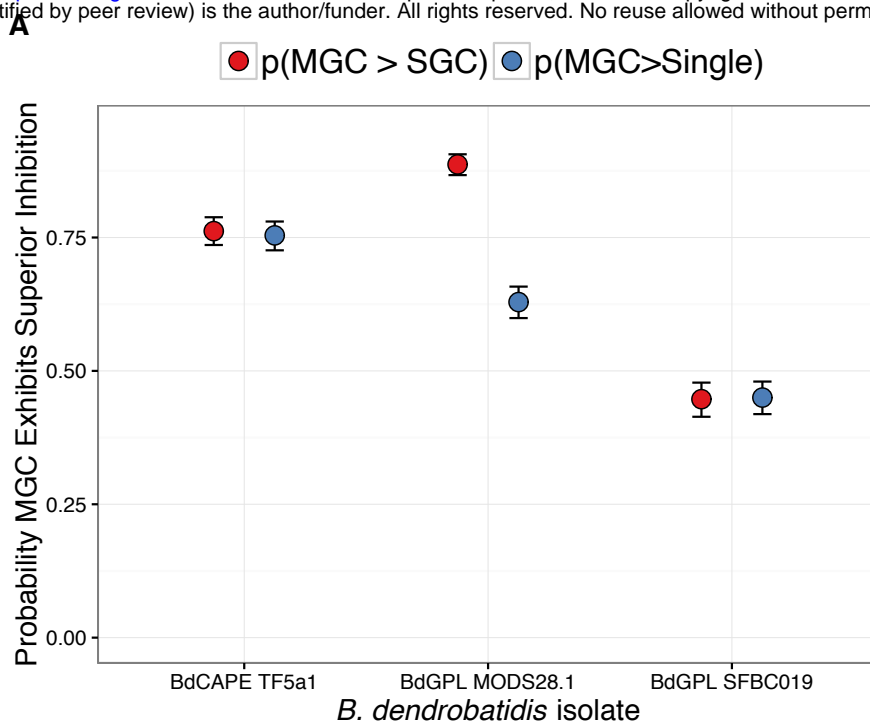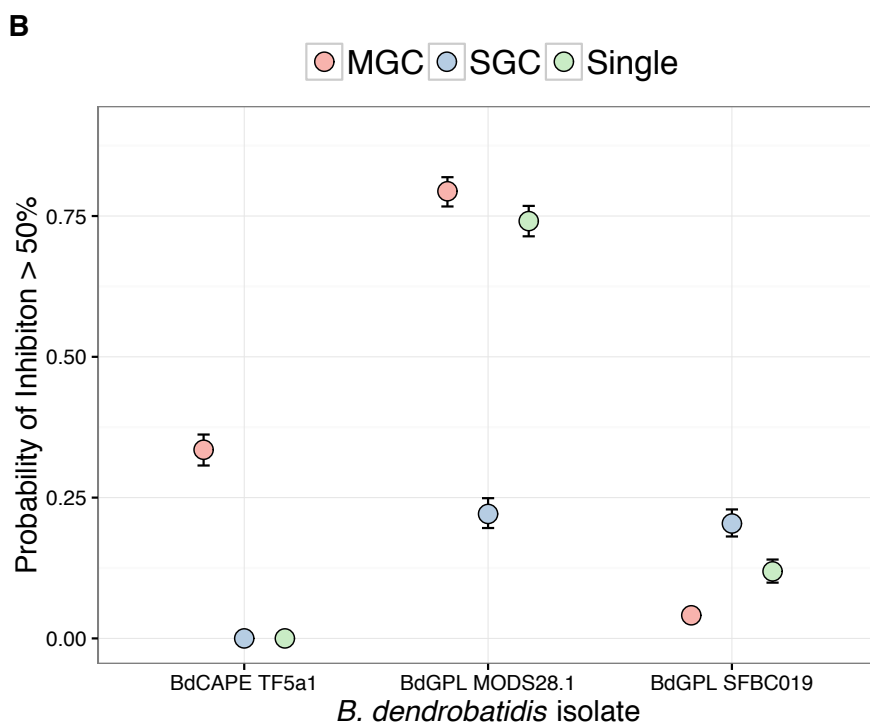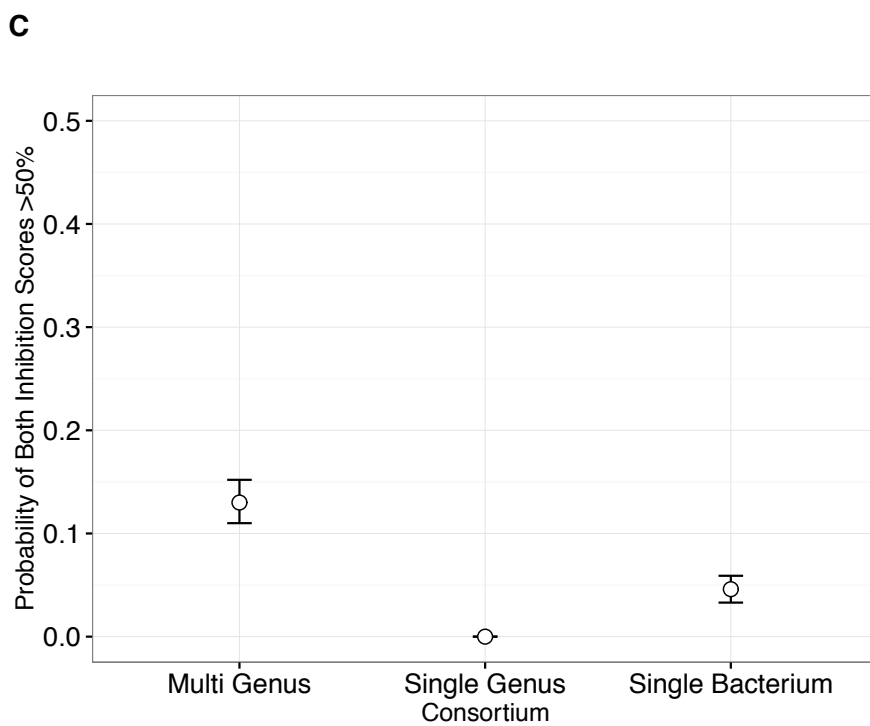

Source: https://www.biorxiv.org/content/10.1101/123968v1.full.pdf
